# Supplementary material for: TRPV4 is the temperature-sensitive ion channel of human sperm
Source: eLife journal article supplement (doi:10.7554/elife.35853), 2018-07-02
Supplement: supp [file elife-35853-supp-v1.zip]

Archive with 12 entries (12 files):
- elife_poa_e35853_Figure_1_figure_supplement_1.pdf
- elife_poa_e35853_Figure_1_source_data_1.docx
- elife_poa_e35853_Figure_6_source_data_1.docx
- elife_poa_e35853_Figure_5_figure_supplement_2.pdf
- elife_poa_e35853_Figure_1_figure_supplement_2.pdf
- elife_poa_e35853_Figure_3_source_data_1.docx
- elife_poa_e35853_Figure_5_figure_supplement_1.pdf
- elife_poa_e35853_Figure_2_source_data_1.docx
- elife_poa_e35853_Transparent_Reporting_File.pdf
- elife_poa_e35853_Figure_4_source_data_1.docx
- elife_poa_e35853_Figure_4_figure_supplement_1.pdf
- elife_poa_e35853_Figure_5_source_data_1.docx
