# Supplementary material for: TRPV4 is the temperature-sensitive ion channel of human sperm
Source: eLife journal article supplement (doi:10.7554/elife.35853), 2018-07-02
Supplement: supp [file elife-35853-supp-v1.zip › elife_poa_e35853_Figure_3_source_data_1.docx]

Source File: Figure 3

Table 4: DSper sodium inward currents

| Fig. no | Experimental condition | at -80 mV, normalized to control | at -80 mV, normalized to 22 ̊C | n, no. of cells | No. of donors |
| --- | --- | --- | --- | --- | --- |
| 3 B-C | DSper control | 1 |  | 3 | 2 |
| 3 B-C | + 1 M NNC | 0.91146 ± 0.10078 |  | 3 | 2 |
| 3 D-E | 22 ̊C |  | 1 | 3 | 2 |
| 3 D-E | 27 ̊C |  | 1.4069 ± 0.08929 | 3 | 2 |
| 3 D-E | 32 ̊C |  | 2.21529 ± 0.39038 | 3 | 2 |
| 3 D-E | 37 ̊C |  | 4.07356 ± 0.50788 | 3 | 2 |
| 3 D-E | 42 ̊C |  | 4.44307 ± 0.97919 | 3 | 2 |
