# Supplementary material for: TRPV4 is the temperature-sensitive ion channel of human sperm
Source: eLife journal article supplement (doi:10.7554/elife.35853), 2018-07-02
Supplement: supp [file elife-35853-supp-v1.zip › elife_poa_e35853_Figure_4_source_data_1.docx]

Source File: Figure 4

Table 5: DSper inward currents potentiated by RN1747

| Fig. no | Experimental condition | at -80 mV, normalized to control | at +80 mV, normalized to control | n, no. of cells | No. of donors |
| --- | --- | --- | --- | --- | --- |
| 4 A-B | DSper control | -1 | 1 | 5 | 2 |
| 4 A-B | + 10 M RN1747 | -1.19601 ± 0.11 | 2.22697 ± 0.23 | 5 | 2 |

Table 6: DSper currents after stimulation with Capsaicin

| Fig. no | Experimental condition | at -80 mV, normalized to control | at +80 mV, normalized to control | n, no. of cells | No. of donors |
| --- | --- | --- | --- | --- | --- |
| 4 – Suppl. Fig. 1 | DSper control | -1 | 1 | 4 | 3 |
| 4 – Suppl. Fig. 1 | + 1 M Capsaicin | -1.06242 ± 0.06869 | 0.98881 ± 0.05053 | 4 | 3 |
| 4 – Suppl. Fig. 1 | + 10 M Capsaicin | -1.06637 ± 0.09003 | 0.90554 ± 0.05565 | 4 | 3 |
| 4 – Suppl. Fig. 1 | + 10 M Capsaicin w/ 30 M PIP2 inside | -0.91182 ± 0.03 | 0.88286 ± 0.07 | 6 | 3 |

Table 7: Calcium imaging (stimulation with 10 M capsaicin after 20 seconds)

| Fig. no | Bath solution | Time (s) | Mean ΔF/F0 | SEM of mean ΔF/F0 | n, no. of cells | No. of donors |
| --- | --- | --- | --- | --- | --- | --- |
| 4 – Suppl. Fig. 1 | HS | 1 | 0.03975 | 0.06103 | 5 | 2 |
| 4 – Suppl. Fig. 1 | HS | 2 | 0.00721 | 0.05456 | 5 | 2 |
| 4 – Suppl. Fig. 1 | HS | 3 | 0.06019 | 0.03978 | 5 | 2 |
| 4 – Suppl. Fig. 1 | HS | 4 | 0.10654 | 0.03607 | 5 | 2 |
| 4 – Suppl. Fig. 1 | HS | 5 | 0.07368 | 0.03479 | 5 | 2 |
| 4 – Suppl. Fig. 1 | HS | 6 | 0.04196 | 0.01911 | 5 | 2 |
| 4 – Suppl. Fig. 1 | HS | 7 | 0.02 | 0.02271 | 5 | 2 |
| 4 – Suppl. Fig. 1 | HS | 8 | 0.0106 | 0.01356 | 5 | 2 |
| 4 – Suppl. Fig. 1 | HS | 9 | 0.01194 | 0.01808 | 5 | 2 |
| 4 – Suppl. Fig. 1 | HS | 10 | -0.03452 | 0.00932 | 5 | 2 |
| 4 – Suppl. Fig. 1 | HS | 11 | 0.03559 | 0.01661 | 5 | 2 |
| 4 – Suppl. Fig. 1 | HS | 12 | -4.10685E-4 | 0.02622 | 5 | 2 |
| 4 – Suppl. Fig. 1 | HS | 13 | 0.00149 | 0.01572 | 5 | 2 |
| 4 – Suppl. Fig. 1 | HS | 14 | -0.03309 | 0.03298 | 5 | 2 |
| 4 – Suppl. Fig. 1 | HS | 15 | -0.05512 | 0.01627 | 5 | 2 |
| 4 – Suppl. Fig. 1 | HS | 16 | -0.0177 | 0.02191 | 5 | 2 |
| 4 – Suppl. Fig. 1 | HS | 17 | -0.05919 | 0.02893 | 5 | 2 |
| 4 – Suppl. Fig. 1 | HS | 18 | -0.06283 | 0.04059 | 5 | 2 |
| 4 – Suppl. Fig. 1 | HS | 19 | -0.06378 | 0.04294 | 5 | 2 |
| 4 – Suppl. Fig. 1 | HS | 20 | -0.08231 | 0.02956 | 5 | 2 |
| 4 – Suppl. Fig. 1 | HS + 10 M capsaicin | 21 | -0.04777 | 0.03526 | 5 | 2 |
| 4 – Suppl. Fig. 1 | HS + 10 M capsaicin | 22 | -0.01727 | 0.04069 | 5 | 2 |
| 4 – Suppl. Fig. 1 | HS + 10 M capsaicin | 23 | -0.06404 | 0.03937 | 5 | 2 |
| 4 – Suppl. Fig. 1 | HS + 10 M capsaicin | 24 | -0.06452 | 0.03658 | 5 | 2 |
| 4 – Suppl. Fig. 1 | HS + 10 M capsaicin | 25 | -0.0975 | 0.04942 | 5 | 2 |
| 4 – Suppl. Fig. 1 | HS + 10 M capsaicin | 26 | -0.07044 | 0.05779 | 5 | 2 |
| 4 – Suppl. Fig. 1 | HS + 10 M capsaicin | 27 | -0.04543 | 0.05984 | 5 | 2 |
| 4 – Suppl. Fig. 1 | HS + 10 M capsaicin | 28 | -0.05921 | 0.06062 | 5 | 2 |
| 4 – Suppl. Fig. 1 | HS + 10 M capsaicin | 29 | -0.0911 | 0.05967 | 5 | 2 |
| 4 – Suppl. Fig. 1 | HS + 10 M capsaicin | 30 | -0.11258 | 0.06772 | 5 | 2 |
| 4 – Suppl. Fig. 1 | HS + 10 M capsaicin | 31 | -0.08967 | 0.06065 | 5 | 2 |
| 4 – Suppl. Fig. 1 | HS + 10 M capsaicin | 32 | -0.10343 | 0.06638 | 5 | 2 |
| 4 – Suppl. Fig. 1 | HS + 10 M capsaicin | 33 | -0.09207 | 0.06196 | 5 | 2 |
| 4 – Suppl. Fig. 1 | HS + 10 M capsaicin | 34 | -0.09737 | 0.0605 | 5 | 2 |
| 4 – Suppl. Fig. 1 | HS + 10 M capsaicin | 35 | -0.12326 | 0.0725 | 5 | 2 |
| 4 – Suppl. Fig. 1 | HS + 10 M capsaicin | 36 | -0.12512 | 0.06763 | 5 | 2 |
| 4 – Suppl. Fig. 1 | HS + 10 M capsaicin | 37 | -0.07485 | 0.06015 | 5 | 2 |
| 4 – Suppl. Fig. 1 | HS + 10 M capsaicin | 38 | -0.11177 | 0.06434 | 5 | 2 |
| 4 – Suppl. Fig. 1 | HS + 10 M capsaicin | 39 | -0.13018 | 0.07074 | 5 | 2 |
| 4 – Suppl. Fig. 1 | HS + 10 M capsaicin | 40 | -0.14309 | 0.0653 | 5 | 2 |
| 4 – Suppl. Fig. 1 | HS + 10 M capsaicin | 41 | -0.10673 | 0.07125 | 5 | 2 |
| 4 – Suppl. Fig. 1 | HS + 10 M capsaicin | 42 | -0.08725 | 0.07686 | 5 | 2 |
| 4 – Suppl. Fig. 1 | HS + 10 M capsaicin | 43 | -0.11358 | 0.06614 | 5 | 2 |
| 4 – Suppl. Fig. 1 | HS + 10 M capsaicin | 44 | -0.08626 | 0.0668 | 5 | 2 |
| 4 – Suppl. Fig. 1 | HS + 10 M capsaicin | 45 | -0.09887 | 0.06884 | 5 | 2 |
| 4 – Suppl. Fig. 1 | HS + 10 M capsaicin | 46 | -0.07932 | 0.0719 | 5 | 2 |
| 4 – Suppl. Fig. 1 | HS + 10 M capsaicin | 47 | -0.07951 | 0.08384 | 5 | 2 |
| 4 – Suppl. Fig. 1 | HS + 10 M capsaicin | 48 | -0.10278 | 0.08167 | 5 | 2 |
| 4 – Suppl. Fig. 1 | HS + 10 M capsaicin | 49 | -0.09406 | 0.09352 | 5 | 2 |
| 4 – Suppl. Fig. 1 | HS + 10 M capsaicin | 50 | -0.10076 | 0.0805 | 5 | 2 |
| 4 – Suppl. Fig. 1 | HS + 10 M capsaicin | 51 | -0.00173 | 0.05178 | 5 | 2 |
| 4 – Suppl. Fig. 1 | HS + 10 M capsaicin | 52 | -0.10482 | 0.08577 | 5 | 2 |
| 4 – Suppl. Fig. 1 | HS + 10 M capsaicin | 53 | -0.09059 | 0.09115 | 5 | 2 |
| 4 – Suppl. Fig. 1 | HS + 10 M capsaicin | 54 | -0.12441 | 0.09078 | 5 | 2 |
| 4 – Suppl. Fig. 1 | HS + 10 M capsaicin | 55 | -0.07905 | 0.08585 | 5 | 2 |
| 4 – Suppl. Fig. 1 | HS + 10 M capsaicin | 56 | -0.10103 | 0.09975 | 5 | 2 |
| 4 – Suppl. Fig. 1 | HS + 10 M capsaicin | 57 | -0.10502 | 0.08535 | 5 | 2 |
| 4 – Suppl. Fig. 1 | HS + 10 M capsaicin | 58 | -0.11374 | 0.08635 | 5 | 2 |
| 4 – Suppl. Fig. 1 | HS + 10 M capsaicin | 59 | -0.12941 | 0.08661 | 5 | 2 |
| 4 – Suppl. Fig. 1 | HS + 10 M capsaicin | 60 | -0.13307 | 0.09629 | 5 | 2 |
| 4 – Suppl. Fig. 1 | HS + 10 M capsaicin | 61 | -0.09809 | 0.08276 | 5 | 2 |
| 4 – Suppl. Fig. 1 | HS + 10 M capsaicin | 62 | -0.11242 | 0.08167 | 5 | 2 |
| 4 – Suppl. Fig. 1 | HS + 10 M capsaicin | 63 | -0.12605 | 0.08772 | 5 | 2 |
| 4 – Suppl. Fig. 1 | HS + 10 M capsaicin | 64 | -0.11937 | 0.08056 | 5 | 2 |
| 4 – Suppl. Fig. 1 | HS + 10 M capsaicin | 65 | -0.09768 | 0.08414 | 5 | 2 |
| 4 – Suppl. Fig. 1 | HS + 10 M capsaicin | 66 | -0.09496 | 0.08138 | 5 | 2 |
| 4 – Suppl. Fig. 1 | HS + 10 M capsaicin | 67 | -0.09379 | 0.08126 | 5 | 2 |
| 4 – Suppl. Fig. 1 | HS + 10 M capsaicin | 68 | -0.1165 | 0.08482 | 5 | 2 |
| 4 – Suppl. Fig. 1 | HS + 10 M capsaicin | 69 | -0.10247 | 0.10279 | 5 | 2 |
| 4 – Suppl. Fig. 1 | HS + 10 M capsaicin | 70 | -0.0885 | 0.11422 | 5 | 2 |
| 4 – Suppl. Fig. 1 | HS + 10 M capsaicin | 71 | -0.11669 | 0.09828 | 5 | 2 |
| 4 – Suppl. Fig. 1 | HS + 10 M capsaicin | 72 | -0.1066 | 0.11007 | 5 | 2 |
| 4 – Suppl. Fig. 1 | HS + 10 M capsaicin | 73 | -0.08365 | 0.11185 | 5 | 2 |
| 4 – Suppl. Fig. 1 | HS + 10 M capsaicin | 74 | -0.06066 | 0.12293 | 5 | 2 |
| 4 – Suppl. Fig. 1 | HS + 10 M capsaicin | 75 | -0.04121 | 0.11889 | 5 | 2 |
| 4 – Suppl. Fig. 1 | HS + 10 M capsaicin | 76 | -0.05587 | 0.10333 | 5 | 2 |
| 4 – Suppl. Fig. 1 | HS + 10 M capsaicin | 77 | -0.10125 | 0.10587 | 5 | 2 |
| 4 – Suppl. Fig. 1 | HS + 10 M capsaicin | 78 | -0.11442 | 0.11006 | 5 | 2 |
| 4 – Suppl. Fig. 1 | HS + 10 M capsaicin | 79 | -0.06941 | 0.11641 | 5 | 2 |
| 4 – Suppl. Fig. 1 | HS + 10 M capsaicin | 80 | -0.06262 | 0.11525 | 5 | 2 |
| 4 – Suppl. Fig. 1 | HS + 10 M capsaicin | 81 | -0.07046 | 0.11626 | 5 | 2 |
| 4 – Suppl. Fig. 1 | HS + 10 M capsaicin | 82 | -0.08853 | 0.115 | 5 | 2 |
| 4 – Suppl. Fig. 1 | HS + 10 M capsaicin | 83 | -0.08818 | 0.11604 | 5 | 2 |
| 4 – Suppl. Fig. 1 | HS + 10 M capsaicin | 84 | -0.06502 | 0.11702 | 5 | 2 |
| 4 – Suppl. Fig. 1 | HS + 10 M capsaicin | 85 | -0.10117 | 0.11462 | 5 | 2 |
| 4 – Suppl. Fig. 1 | HS + 10 M capsaicin | 86 | -0.09632 | 0.12355 | 5 | 2 |
| 4 – Suppl. Fig. 1 | HS + 10 M capsaicin | 87 | -0.12099 | 0.11307 | 5 | 2 |
| 4 – Suppl. Fig. 1 | HS + 10 M capsaicin | 88 | -0.06395 | 0.1127 | 5 | 2 |
| 4 – Suppl. Fig. 1 | HS + 10 M capsaicin | 89 | -0.05558 | 0.12243 | 5 | 2 |
| 4 – Suppl. Fig. 1 | HS + 10 M capsaicin | 90 | -0.0892 | 0.1223 | 5 | 2 |
| 4 – Suppl. Fig. 1 | HS + 10 M capsaicin | 91 | -0.06722 | 0.12786 | 5 | 2 |
| 4 – Suppl. Fig. 1 | HS + 10 M capsaicin | 92 | -0.06155 | 0.1242 | 5 | 2 |
| 4 – Suppl. Fig. 1 | HS + 10 M capsaicin | 93 | -0.05198 | 0.12786 | 5 | 2 |
| 4 – Suppl. Fig. 1 | HS + 10 M capsaicin | 94 | -0.07337 | 0.13195 | 5 | 2 |
| 4 – Suppl. Fig. 1 | HS + 10 M capsaicin | 95 | -0.04342 | 0.14251 | 5 | 2 |
| 4 – Suppl. Fig. 1 | HS + 10 M capsaicin | 96 | -0.04133 | 0.14027 | 5 | 2 |
| 4 – Suppl. Fig. 1 | HS + 10 M capsaicin | 97 | -0.07094 | 0.12817 | 5 | 2 |
| 4 – Suppl. Fig. 1 | HS + 10 M capsaicin | 98 | -0.0209 | 0.13406 | 5 | 2 |
| 4 – Suppl. Fig. 1 | HS + 10 M capsaicin | 99 | -0.05779 | 0.13792 | 5 | 2 |
| 4 – Suppl. Fig. 1 | HS + 10 M capsaicin | 100 | -0.06662 | 0.13175 | 5 | 2 |
| 4 – Suppl. Fig. 1 | HS + 10 M capsaicin | 101 | -0.05226 | 0.12951 | 5 | 2 |
| 4 – Suppl. Fig. 1 | HS + 10 M capsaicin | 102 | -0.07415 | 0.13017 | 5 | 2 |
| 4 – Suppl. Fig. 1 | HS + 10 M capsaicin | 103 | -0.07821 | 0.13234 | 5 | 2 |
| 4 – Suppl. Fig. 1 | HS + 10 M capsaicin | 104 | -0.07447 | 0.13373 | 5 | 2 |
| 4 – Suppl. Fig. 1 | HS + 10 M capsaicin | 105 | -0.08219 | 0.12897 | 5 | 2 |
| 4 – Suppl. Fig. 1 | HS + 10 M capsaicin | 106 | -0.09162 | 0.12284 | 5 | 2 |
| 4 – Suppl. Fig. 1 | HS + 10 M capsaicin | 107 | -0.07758 | 0.14242 | 5 | 2 |
| 4 – Suppl. Fig. 1 | HS + 10 M capsaicin | 108 | -0.05167 | 0.12448 | 5 | 2 |
| 4 – Suppl. Fig. 1 | HS + 10 M capsaicin | 109 | -0.10912 | 0.1283 | 5 | 2 |
| 4 – Suppl. Fig. 1 | HS + 10 M capsaicin | 110 | -0.08135 | 0.13364 | 5 | 2 |
| 4 – Suppl. Fig. 1 | HS + 10 M capsaicin | 111 | -0.08535 | 0.12533 | 5 | 2 |
| 4 – Suppl. Fig. 1 | HS + 10 M capsaicin | 112 | -0.07089 | 0.13816 | 5 | 2 |
| 4 – Suppl. Fig. 1 | HS + 10 M capsaicin | 113 | -0.07346 | 0.13188 | 5 | 2 |
| 4 – Suppl. Fig. 1 | HS + 10 M capsaicin | 114 | -0.10181 | 0.13663 | 5 | 2 |
| 4 – Suppl. Fig. 1 | HS + 10 M capsaicin | 115 | -0.09163 | 0.1375 | 5 | 2 |
| 4 – Suppl. Fig. 1 | HS + 10 M capsaicin | 116 | -0.06812 | 0.12425 | 5 | 2 |
| 4 – Suppl. Fig. 1 | HS + 10 M capsaicin | 117 | -0.08229 | 0.12951 | 5 | 2 |
| 4 – Suppl. Fig. 1 | HS + 10 M capsaicin | 118 | -0.11175 | 0.12104 | 5 | 2 |
| 4 – Suppl. Fig. 1 | HS + 10 M capsaicin | 119 | -0.0741 | 0.12761 | 5 | 2 |
| 4 – Suppl. Fig. 1 | HS + 10 M capsaicin | 120 | -0.10501 | 0.14552 | 5 | 2 |
| 4 – Suppl. Fig. 1 | HS + 10 M capsaicin | 121 | -0.114 | 0.13258 | 5 | 2 |
| 4 – Suppl. Fig. 1 | HS + 10 M capsaicin | 122 | 0.03975 | 0.06103 | 5 | 2 |
| 4 – Suppl. Fig. 1 | HS + 10 M capsaicin | 123 | 0.00721 | 0.05456 | 5 | 2 |
| 4 – Suppl. Fig. 1 | HS + 10 M capsaicin | 124 | 0.06019 | 0.03978 | 5 | 2 |
| 4 – Suppl. Fig. 1 | HS + 10 M capsaicin | 125 | 0.10654 | 0.03607 | 5 | 2 |
| 4 – Suppl. Fig. 1 | HS + 10 M capsaicin | 126 | 0.07368 | 0.03479 | 5 | 2 |
| 4 – Suppl. Fig. 1 | HS + 10 M capsaicin | 127 | 0.04196 | 0.01911 | 5 | 2 |
| 4 – Suppl. Fig. 1 | HS + 10 M capsaicin | 128 | 0.02 | 0.02271 | 5 | 2 |
| 4 – Suppl. Fig. 1 | HS + 10 M capsaicin | 129 | 0.0106 | 0.01356 | 5 | 2 |
| 4 – Suppl. Fig. 1 | HS + 10 M capsaicin | 130 | 0.01194 | 0.01808 | 5 | 2 |
| 4 – Suppl. Fig. 1 | HS + 10 M capsaicin | 131 | -0.03452 | 0.00932 | 5 | 2 |
| 4 – Suppl. Fig. 1 | HS + 10 M capsaicin | 132 | 0.03559 | 0.01661 | 5 | 2 |
| 4 – Suppl. Fig. 1 | HS + 10 M capsaicin | 133 | -4.10685E-4 | 0.02622 | 5 | 2 |
| 4 – Suppl. Fig. 1 | HS + 10 M capsaicin | 134 | 0.00149 | 0.01572 | 5 | 2 |
| 4 – Suppl. Fig. 1 | HS + 10 M capsaicin | 135 | -0.03309 | 0.03298 | 5 | 2 |
| 4 – Suppl. Fig. 1 | HS + 10 M capsaicin | 136 | -0.05512 | 0.01627 | 5 | 2 |
| 4 – Suppl. Fig. 1 | HS + 10 M capsaicin | 137 | -0.0177 | 0.02191 | 5 | 2 |
| 4 – Suppl. Fig. 1 | HS + 10 M capsaicin | 138 | -0.05919 | 0.02893 | 5 | 2 |
| 4 – Suppl. Fig. 1 | HS + 10 M capsaicin | 139 | -0.06283 | 0.04059 | 5 | 2 |
| 4 – Suppl. Fig. 1 | HS + 10 M capsaicin | 140 | -0.06378 | 0.04294 | 5 | 2 |
| 4 – Suppl. Fig. 1 | HS + 10 M capsaicin | 141 | -0.08231 | 0.02956 | 5 | 2 |
| 4 – Suppl. Fig. 1 | HS + 10 M capsaicin | 142 | -0.04777 | 0.03526 | 5 | 2 |
| 4 – Suppl. Fig. 1 | HS + 10 M capsaicin | 143 | -0.01727 | 0.04069 | 5 | 2 |
| 4 – Suppl. Fig. 1 | HS + 10 M capsaicin | 144 | -0.06404 | 0.03937 | 5 | 2 |
| 4 – Suppl. Fig. 1 | HS + 10 M capsaicin | 145 | -0.06452 | 0.03658 | 5 | 2 |
| 4 – Suppl. Fig. 1 | HS + 10 M capsaicin | 146 | -0.0975 | 0.04942 | 5 | 2 |
| 4 – Suppl. Fig. 1 | HS + 10 M capsaicin | 147 | -0.07044 | 0.05779 | 5 | 2 |
| 4 – Suppl. Fig. 1 | HS + 10 M capsaicin | 148 | -0.04543 | 0.05984 | 5 | 2 |
| 4 – Suppl. Fig. 1 | HS + 10 M capsaicin | 149 | -0.05921 | 0.06062 | 5 | 2 |
| 4 – Suppl. Fig. 1 | HS + 10 M capsaicin | 150 | -0.0911 | 0.05967 | 5 | 2 |

Table 8: Calcium imaging (stimulation with 500 M carvacrol after 20 s)

| Fig. no | Bath solution | Time (s) | Mean ΔF/F0 | SEM of mean ΔF/F0 | n, no. of cells | No. of donors |
| --- | --- | --- | --- | --- | --- | --- |
| 4 – Suppl. Fig. 1 | HS | 1 | 0.02611 | 0.0087 | 4 | 2 |
| 4 – Suppl. Fig. 1 | HS | 2 | 0.01223 | 0.00896 | 4 | 2 |
| 4 – Suppl. Fig. 1 | HS | 3 | 0.01347 | 0.01809 | 4 | 2 |
| 4 – Suppl. Fig. 1 | HS | 4 | 0.00355 | 0.01958 | 4 | 2 |
| 4 – Suppl. Fig. 1 | HS | 5 | -0.00728 | 0.01405 | 4 | 2 |
| 4 – Suppl. Fig. 1 | HS | 6 | 0.00107 | 0.00864 | 4 | 2 |
| 4 – Suppl. Fig. 1 | HS | 7 | -0.03023 | 0.01495 | 4 | 2 |
| 4 – Suppl. Fig. 1 | HS | 8 | -0.01932 | 0.00625 | 4 | 2 |
| 4 – Suppl. Fig. 1 | HS | 9 | 0.01245 | 0.00747 | 4 | 2 |
| 4 – Suppl. Fig. 1 | HS | 10 | 0.00215 | 0.02058 | 4 | 2 |
| 4 – Suppl. Fig. 1 | HS | 11 | -0.00592 | 0.00878 | 4 | 2 |
| 4 – Suppl. Fig. 1 | HS | 12 | 0.01013 | 0.00422 | 4 | 2 |
| 4 – Suppl. Fig. 1 | HS | 13 | -0.00481 | 0.00918 | 4 | 2 |
| 4 – Suppl. Fig. 1 | HS | 14 | 0.00993 | 0.01069 | 4 | 2 |
| 4 – Suppl. Fig. 1 | HS | 15 | -0.00147 | 0.00623 | 4 | 2 |
| 4 – Suppl. Fig. 1 | HS | 16 | -0.01141 | 0.0153 | 4 | 2 |
| 4 – Suppl. Fig. 1 | HS | 17 | -0.01621 | 0.01191 | 4 | 2 |
| 4 – Suppl. Fig. 1 | HS | 18 | 0.01357 | 0.01435 | 4 | 2 |
| 4 – Suppl. Fig. 1 | HS | 19 | -0.00782 | 0.01536 | 4 | 2 |
| 4 – Suppl. Fig. 1 | HS | 20 | -1.96844E-4 | 0.02032 | 4 | 2 |
| 4 – Suppl. Fig. 1 | HS + 500 M carvacrol | 21 | 7.59213E-4 | 0.02804 | 4 | 2 |
| 4 – Suppl. Fig. 1 | HS + 500 M carvacrol | 22 | -0.02029 | 0.04359 | 4 | 2 |
| 4 – Suppl. Fig. 1 | HS + 500 M carvacrol | 23 | -0.01146 | 0.02521 | 4 | 2 |
| 4 – Suppl. Fig. 1 | HS + 500 M carvacrol | 24 | 0.00529 | 0.03772 | 4 | 2 |
| 4 – Suppl. Fig. 1 | HS + 500 M carvacrol | 25 | -0.01162 | 0.02524 | 4 | 2 |
| 4 – Suppl. Fig. 1 | HS + 500 M carvacrol | 26 | -0.00968 | 0.02087 | 4 | 2 |
| 4 – Suppl. Fig. 1 | HS + 500 M carvacrol | 27 | -0.02563 | 0.02303 | 4 | 2 |
| 4 – Suppl. Fig. 1 | HS + 500 M carvacrol | 28 | -0.01989 | 0.01571 | 4 | 2 |
| 4 – Suppl. Fig. 1 | HS + 500 M carvacrol | 29 | -0.00707 | 0.0258 | 4 | 2 |
| 4 – Suppl. Fig. 1 | HS + 500 M carvacrol | 30 | -0.01979 | 0.04289 | 4 | 2 |
| 4 – Suppl. Fig. 1 | HS + 500 M carvacrol | 31 | -0.02946 | 0.04457 | 4 | 2 |
| 4 – Suppl. Fig. 1 | HS + 500 M carvacrol | 32 | -0.01488 | 0.03003 | 4 | 2 |
| 4 – Suppl. Fig. 1 | HS + 500 M carvacrol | 33 | -0.01083 | 0.04081 | 4 | 2 |
| 4 – Suppl. Fig. 1 | HS + 500 M carvacrol | 34 | -0.00797 | 0.03638 | 4 | 2 |
| 4 – Suppl. Fig. 1 | HS + 500 M carvacrol | 35 | -0.05372 | 0.03209 | 4 | 2 |
| 4 – Suppl. Fig. 1 | HS + 500 M carvacrol | 36 | -0.03504 | 0.02784 | 4 | 2 |
| 4 – Suppl. Fig. 1 | HS + 500 M carvacrol | 37 | -0.04594 | 0.04206 | 4 | 2 |
| 4 – Suppl. Fig. 1 | HS + 500 M carvacrol | 38 | -0.01355 | 0.03186 | 4 | 2 |
| 4 – Suppl. Fig. 1 | HS + 500 M carvacrol | 39 | -0.02945 | 0.03385 | 4 | 2 |
| 4 – Suppl. Fig. 1 | HS + 500 M carvacrol | 40 | -0.03044 | 0.0335 | 4 | 2 |
| 4 – Suppl. Fig. 1 | HS + 500 M carvacrol | 41 | -0.04633 | 0.04159 | 4 | 2 |
| 4 – Suppl. Fig. 1 | HS + 500 M carvacrol | 42 | -0.06416 | 0.03565 | 4 | 2 |
| 4 – Suppl. Fig. 1 | HS + 500 M carvacrol | 43 | -0.04557 | 0.05487 | 4 | 2 |
| 4 – Suppl. Fig. 1 | HS + 500 M carvacrol | 44 | -0.07809 | 0.04713 | 4 | 2 |
| 4 – Suppl. Fig. 1 | HS + 500 M carvacrol | 45 | -0.06335 | 0.04351 | 4 | 2 |
| 4 – Suppl. Fig. 1 | HS + 500 M carvacrol | 46 | -0.07315 | 0.05848 | 4 | 2 |
| 4 – Suppl. Fig. 1 | HS + 500 M carvacrol | 47 | -0.06251 | 0.04965 | 4 | 2 |
| 4 – Suppl. Fig. 1 | HS + 500 M carvacrol | 48 | -0.063 | 0.06561 | 4 | 2 |
| 4 – Suppl. Fig. 1 | HS + 500 M carvacrol | 49 | -0.06063 | 0.0577 | 4 | 2 |
| 4 – Suppl. Fig. 1 | HS + 500 M carvacrol | 50 | -0.06031 | 0.05406 | 4 | 2 |
| 4 – Suppl. Fig. 1 | HS + 500 M carvacrol | 51 | -0.07601 | 0.05504 | 4 | 2 |
| 4 – Suppl. Fig. 1 | HS + 500 M carvacrol | 52 | -0.05048 | 0.05046 | 4 | 2 |
| 4 – Suppl. Fig. 1 | HS + 500 M carvacrol | 53 | -0.06674 | 0.0657 | 4 | 2 |
| 4 – Suppl. Fig. 1 | HS + 500 M carvacrol | 54 | -0.08216 | 0.06814 | 4 | 2 |
| 4 – Suppl. Fig. 1 | HS + 500 M carvacrol | 55 | -0.08507 | 0.05274 | 4 | 2 |
| 4 – Suppl. Fig. 1 | HS + 500 M carvacrol | 56 | -0.09597 | 0.05718 | 4 | 2 |
| 4 – Suppl. Fig. 1 | HS + 500 M carvacrol | 57 | -0.07759 | 0.05734 | 4 | 2 |
| 4 – Suppl. Fig. 1 | HS + 500 M carvacrol | 58 | -0.06625 | 0.06593 | 4 | 2 |
| 4 – Suppl. Fig. 1 | HS + 500 M carvacrol | 59 | -0.05452 | 0.06535 | 4 | 2 |
| 4 – Suppl. Fig. 1 | HS + 500 M carvacrol | 60 | -0.06403 | 0.05647 | 4 | 2 |
| 4 – Suppl. Fig. 1 | HS + 500 M carvacrol | 61 | -0.05069 | 0.07044 | 4 | 2 |
| 4 – Suppl. Fig. 1 | HS + 500 M carvacrol | 62 | -0.06107 | 0.06911 | 4 | 2 |
| 4 – Suppl. Fig. 1 | HS + 500 M carvacrol | 63 | -0.0597 | 0.06393 | 4 | 2 |
| 4 – Suppl. Fig. 1 | HS + 500 M carvacrol | 64 | -0.05884 | 0.07059 | 4 | 2 |
| 4 – Suppl. Fig. 1 | HS + 500 M carvacrol | 65 | -0.09007 | 0.06706 | 4 | 2 |
| 4 – Suppl. Fig. 1 | HS + 500 M carvacrol | 66 | -0.05405 | 0.08224 | 4 | 2 |
| 4 – Suppl. Fig. 1 | HS + 500 M carvacrol | 67 | -0.03703 | 0.07157 | 4 | 2 |
| 4 – Suppl. Fig. 1 | HS + 500 M carvacrol | 68 | -0.07639 | 0.07483 | 4 | 2 |
| 4 – Suppl. Fig. 1 | HS + 500 M carvacrol | 69 | -0.05218 | 0.06695 | 4 | 2 |
| 4 – Suppl. Fig. 1 | HS + 500 M carvacrol | 70 | -0.07747 | 0.05506 | 4 | 2 |
| 4 – Suppl. Fig. 1 | HS + 500 M carvacrol | 71 | -0.10773 | 0.07429 | 4 | 2 |
| 4 – Suppl. Fig. 1 | HS + 500 M carvacrol | 72 | -0.07225 | 0.0603 | 4 | 2 |
| 4 – Suppl. Fig. 1 | HS + 500 M carvacrol | 73 | -0.07004 | 0.06216 | 4 | 2 |
| 4 – Suppl. Fig. 1 | HS + 500 M carvacrol | 74 | -0.0537 | 0.07356 | 4 | 2 |
| 4 – Suppl. Fig. 1 | HS + 500 M carvacrol | 75 | -0.06564 | 0.07432 | 4 | 2 |
| 4 – Suppl. Fig. 1 | HS + 500 M carvacrol | 76 | -0.07898 | 0.07454 | 4 | 2 |
| 4 – Suppl. Fig. 1 | HS + 500 M carvacrol | 77 | -0.06851 | 0.07589 | 4 | 2 |
| 4 – Suppl. Fig. 1 | HS + 500 M carvacrol | 78 | -0.07537 | 0.07262 | 4 | 2 |
| 4 – Suppl. Fig. 1 | HS + 500 M carvacrol | 79 | -0.05275 | 0.07888 | 4 | 2 |
| 4 – Suppl. Fig. 1 | HS + 500 M carvacrol | 80 | -0.0787 | 0.08625 | 4 | 2 |
| 4 – Suppl. Fig. 1 | HS + 500 M carvacrol | 81 | -0.06351 | 0.06505 | 4 | 2 |
| 4 – Suppl. Fig. 1 | HS + 500 M carvacrol | 82 | -0.06741 | 0.08443 | 4 | 2 |
| 4 – Suppl. Fig. 1 | HS + 500 M carvacrol | 83 | -0.05303 | 0.09118 | 4 | 2 |
| 4 – Suppl. Fig. 1 | HS + 500 M carvacrol | 84 | -0.0513 | 0.08246 | 4 | 2 |
| 4 – Suppl. Fig. 1 | HS + 500 M carvacrol | 85 | -0.07337 | 0.08359 | 4 | 2 |
| 4 – Suppl. Fig. 1 | HS + 500 M carvacrol | 86 | -0.05513 | 0.07934 | 4 | 2 |
| 4 – Suppl. Fig. 1 | HS + 500 M carvacrol | 87 | -0.05696 | 0.09363 | 4 | 2 |
| 4 – Suppl. Fig. 1 | HS + 500 M carvacrol | 88 | -0.06417 | 0.08183 | 4 | 2 |
| 4 – Suppl. Fig. 1 | HS + 500 M carvacrol | 89 | -0.06226 | 0.08991 | 4 | 2 |
| 4 – Suppl. Fig. 1 | HS + 500 M carvacrol | 90 | -0.0589 | 0.08076 | 4 | 2 |
| 4 – Suppl. Fig. 1 | HS + 500 M carvacrol | 91 | -0.0913 | 0.09009 | 4 | 2 |
| 4 – Suppl. Fig. 1 | HS + 500 M carvacrol | 92 | -0.06323 | 0.08253 | 4 | 2 |
| 4 – Suppl. Fig. 1 | HS + 500 M carvacrol | 93 | -0.05592 | 0.08494 | 4 | 2 |
| 4 – Suppl. Fig. 1 | HS + 500 M carvacrol | 94 | -0.071 | 0.09826 | 4 | 2 |
| 4 – Suppl. Fig. 1 | HS + 500 M carvacrol | 95 | -0.04909 | 0.08736 | 4 | 2 |
| 4 – Suppl. Fig. 1 | HS + 500 M carvacrol | 96 | -0.07477 | 0.09408 | 4 | 2 |
| 4 – Suppl. Fig. 1 | HS + 500 M carvacrol | 97 | -0.05238 | 0.08816 | 4 | 2 |
| 4 – Suppl. Fig. 1 | HS + 500 M carvacrol | 98 | -0.05204 | 0.08104 | 4 | 2 |
| 4 – Suppl. Fig. 1 | HS + 500 M carvacrol | 99 | -0.05634 | 0.08761 | 4 | 2 |
| 4 – Suppl. Fig. 1 | HS + 500 M carvacrol | 100 | -0.05133 | 0.09144 | 4 | 2 |
| 4 – Suppl. Fig. 1 | HS + 500 M carvacrol | 101 | -0.06662 | 0.08943 | 4 | 2 |
| 4 – Suppl. Fig. 1 | HS + 500 M carvacrol | 102 | -0.05556 | 0.09322 | 4 | 2 |
| 4 – Suppl. Fig. 1 | HS + 500 M carvacrol | 103 | -0.08913 | 0.09604 | 4 | 2 |
| 4 – Suppl. Fig. 1 | HS + 500 M carvacrol | 104 | -0.05849 | 0.10142 | 4 | 2 |
| 4 – Suppl. Fig. 1 | HS + 500 M carvacrol | 105 | -0.04656 | 0.09019 | 4 | 2 |
| 4 – Suppl. Fig. 1 | HS + 500 M carvacrol | 106 | -0.06797 | 0.09195 | 4 | 2 |
| 4 – Suppl. Fig. 1 | HS + 500 M carvacrol | 107 | -0.07906 | 0.08876 | 4 | 2 |
| 4 – Suppl. Fig. 1 | HS + 500 M carvacrol | 108 | -0.04687 | 0.09225 | 4 | 2 |
| 4 – Suppl. Fig. 1 | HS + 500 M carvacrol | 109 | -0.04592 | 0.09444 | 4 | 2 |
| 4 – Suppl. Fig. 1 | HS + 500 M carvacrol | 110 | -0.0507 | 0.09978 | 4 | 2 |
| 4 – Suppl. Fig. 1 | HS + 500 M carvacrol | 111 | -0.04389 | 0.10266 | 4 | 2 |
| 4 – Suppl. Fig. 1 | HS + 500 M carvacrol | 112 | -0.02342 | 0.10111 | 4 | 2 |
| 4 – Suppl. Fig. 1 | HS + 500 M carvacrol | 113 | -0.00591 | 0.11139 | 4 | 2 |
| 4 – Suppl. Fig. 1 | HS + 500 M carvacrol | 114 | 0.00132 | 0.11443 | 4 | 2 |
| 4 – Suppl. Fig. 1 | HS + 500 M carvacrol | 115 | 0.00498 | 0.12077 | 4 | 2 |
| 4 – Suppl. Fig. 1 | HS + 500 M carvacrol | 116 | 0.00605 | 0.11994 | 4 | 2 |
| 4 – Suppl. Fig. 1 | HS + 500 M carvacrol | 117 | 0.0232 | 0.12555 | 4 | 2 |
| 4 – Suppl. Fig. 1 | HS + 500 M carvacrol | 118 | 0.00102 | 0.11497 | 4 | 2 |
| 4 – Suppl. Fig. 1 | HS + 500 M carvacrol | 119 | 0.03712 | 0.12008 | 4 | 2 |
| 4 – Suppl. Fig. 1 | HS + 500 M carvacrol | 120 | -0.03191 | 0.11782 | 4 | 2 |
| 4 – Suppl. Fig. 1 | HS + 500 M carvacrol | 121 | -0.0092 | 0.10169 | 4 | 2 |
| 4 – Suppl. Fig. 1 | HS + 500 M carvacrol | 122 | -0.02125 | 0.10592 | 4 | 2 |
| 4 – Suppl. Fig. 1 | HS + 500 M carvacrol | 123 | -0.01808 | 0.09896 | 4 | 2 |
| 4 – Suppl. Fig. 1 | HS + 500 M carvacrol | 124 | -0.01204 | 0.10236 | 4 | 2 |
| 4 – Suppl. Fig. 1 | HS + 500 M carvacrol | 125 | -0.01202 | 0.0999 | 4 | 2 |
| 4 – Suppl. Fig. 1 | HS + 500 M carvacrol | 126 | -0.01095 | 0.09147 | 4 | 2 |
| 4 – Suppl. Fig. 1 | HS + 500 M carvacrol | 127 | -0.03109 | 0.09687 | 4 | 2 |
| 4 – Suppl. Fig. 1 | HS + 500 M carvacrol | 128 | 0.00283 | 0.1006 | 4 | 2 |
| 4 – Suppl. Fig. 1 | HS + 500 M carvacrol | 129 | -0.02938 | 0.09745 | 4 | 2 |
| 4 – Suppl. Fig. 1 | HS + 500 M carvacrol | 130 | -0.04798 | 0.09407 | 4 | 2 |
| 4 – Suppl. Fig. 1 | HS + 500 M carvacrol | 131 | -0.04375 | 0.09783 | 4 | 2 |
| 4 – Suppl. Fig. 1 | HS + 500 M carvacrol | 132 | -0.03021 | 0.09263 | 4 | 2 |
| 4 – Suppl. Fig. 1 | HS + 500 M carvacrol | 133 | -0.01546 | 0.10389 | 4 | 2 |
| 4 – Suppl. Fig. 1 | HS + 500 M carvacrol | 134 | -0.00751 | 0.09845 | 4 | 2 |
| 4 – Suppl. Fig. 1 | HS + 500 M carvacrol | 135 | -0.04126 | 0.09977 | 4 | 2 |
| 4 – Suppl. Fig. 1 | HS + 500 M carvacrol | 136 | -0.029 | 0.09441 | 4 | 2 |
| 4 – Suppl. Fig. 1 | HS + 500 M carvacrol | 137 | -0.04065 | 0.09682 | 4 | 2 |
| 4 – Suppl. Fig. 1 | HS + 500 M carvacrol | 138 | -0.03879 | 0.10161 | 4 | 2 |
| 4 – Suppl. Fig. 1 | HS + 500 M carvacrol | 139 | -0.02022 | 0.09036 | 4 | 2 |
| 4 – Suppl. Fig. 1 | HS + 500 M carvacrol | 140 | -0.03357 | 0.10031 | 4 | 2 |
| 4 – Suppl. Fig. 1 | HS + 500 M carvacrol | 141 | -0.04109 | 0.10352 | 4 | 2 |
| 4 – Suppl. Fig. 1 | HS + 500 M carvacrol | 142 | -0.04802 | 0.10613 | 4 | 2 |
| 4 – Suppl. Fig. 1 | HS + 500 M carvacrol | 143 | -0.05031 | 0.09871 | 4 | 2 |
| 4 – Suppl. Fig. 1 | HS + 500 M carvacrol | 144 | -0.0407 | 0.10194 | 4 | 2 |
| 4 – Suppl. Fig. 1 | HS + 500 M carvacrol | 145 | -0.02139 | 0.0983 | 4 | 2 |
| 4 – Suppl. Fig. 1 | HS + 500 M carvacrol | 146 | -0.03326 | 0.09508 | 4 | 2 |
| 4 – Suppl. Fig. 1 | HS + 500 M carvacrol | 147 | -0.02913 | 0.09884 | 4 | 2 |
| 4 – Suppl. Fig. 1 | HS + 500 M carvacrol | 148 | -0.00234 | 0.10422 | 4 | 2 |
| 4 – Suppl. Fig. 1 | HS + 500 M carvacrol | 149 | -0.02471 | 0.10371 | 4 | 2 |
| 4 – Suppl. Fig. 1 | HS + 500 M carvacrol | 150 | 0.00224 | 0.10177 | 4 | 2 |

Table 9: Pregnonolone sulfate effect on IDSper

| Fig. no | Experimental condition | I at -80 mV normalized to control | I at +80 mV normalized to control | n, no. of cells | No. of donors |
| --- | --- | --- | --- | --- | --- |
| 4 – Suppl. Fig. 1 | DSper control | -1 | 1 | 7 | 3 |
| 4 – Suppl. Fig. 1 | DSper + 10 M PS | -1.04058 ± 0.05 | 1.11964 ± 0.12 | 7 | 3 |
