# Supplementary material for: TRPV4 is the temperature-sensitive ion channel of human sperm
Source: eLife journal article supplement (doi:10.7554/elife.35853), 2018-07-02
Supplement: supp [file elife_poa_e35853_Figure_1_source_data_1.docx]

Source File: Figure 1

Table 1: Inward and Outward DSper currents

| Fig. no. | Experimental condition | at -80 mV, pA/pF | at +80 mV, pA/pF | IDSper -fold change at -80 mV | n, no. of cells | No. of donors |
| --- | --- | --- | --- | --- | --- | --- |
| 1A-C | Baseline (noncap.) | -3.01523 ± 0.33427 | 7.16191 ± 0.4117 |  | 43 | 3 |
| 1A-C | DVF (noncap.) | -17.36211 ± 2.64467 | 126.54189 ± 11.29272 |  | 47 | 3 |
| 1A-C | DVF + 1 mM MG2+ (noncap.) | -4.49913 ± 0.41333 | 28.80866 ± 1.93334 |  | 49 | 3 |
| 1A-C | Baseline (cap.) | 10.28051 ± 2.22536 | 15.92858 ± 1.50868 |  | 4 | 3 |
| 1A-C | DVF (cap.) | 49.80851 ± 3.97713 | 183.72758 ±  20.10993 |  | 4 | 3 |
| 1A-C | DVF + 1 mM MG2+ (cap.) | 25.57923 ± 5.88305 | 42.66914 ± 9.27394 |  | 4 | 3 |
| 1D-F | DVF + 1 mM MG2+ (noncap.) |  |  | 1 | 9 | 3 |
| 1D-F | DVF + 1 mM MG2+ + 1 M NNC (noncap.) |  |  | 0.9688 ± 0.11394 | 9 | 3 |
| 1D-F | DVF + 1 mM MG2+ (cap.) |  |  | 1 | 4 | 3 |
| 1D-F | DVF + 1 mM MG2+ + 1 M NNC (cap.) |  |  | 0.95323 ± 0.04992 | 4 | 3 |

Table 2: Divalent CatSper inward currents

| Fig. no. | Extracellular cation | at -80 mV, pA/pF | n, no. of cells | No. of donors |
| --- | --- | --- | --- | --- |
| 1 – Suppl. Fig. 1 | 2 mM Ca2+ | 4.53883 ± 1.13556 | 3 | 3 |
| 1 – Suppl. Fig. 1 | 10 mM Ba2+ | 24.23848 ± 5.8756 | 3 | 3 |
| 1 – Suppl. Fig. 1 | 50 mM Mg2+ | 2.20082 ± 0.26389 | 3 | 3 |
