# Supplementary figures and images for: TRPV4 is the temperature-sensitive ion channel of human sperm
Source: eLife journal article supplement (doi:10.7554/elife.35853), 2018-07-02

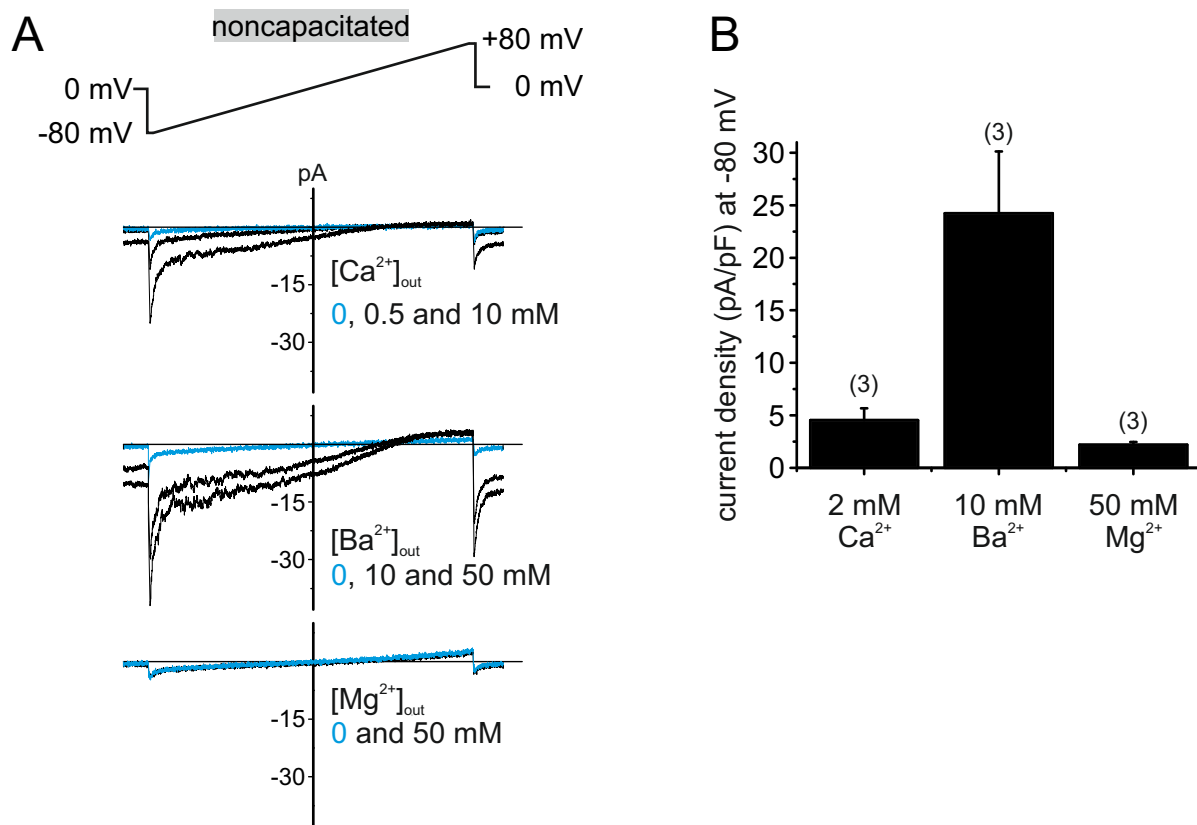

Fig. 1 - Supplementary Fig. 1: Human CatSper conducts  $\text{Ca}^{2+}$  and  $\text{Ba}^{2+}$  but not  $\text{Mg}^{2+}$

Supplement: supp [file elife-35853-supp-v1.zip › elife_poa_e35853_Figure_1_figure_supplement_1.pdf]

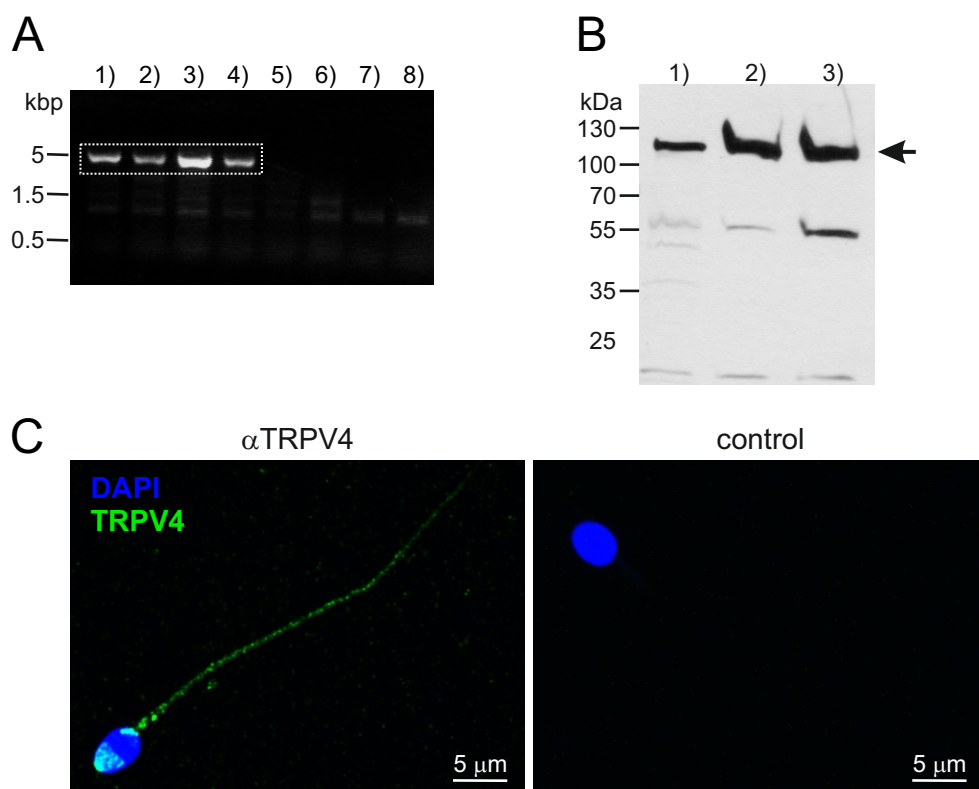

Fig. 5 - Supplementary Fig. 2: TRPV4 can be detected on protein and mRNA level.

Supplement: supp [file elife-35853-supp-v1.zip › elife_poa_e35853_Figure_5_figure_supplement_2.pdf]

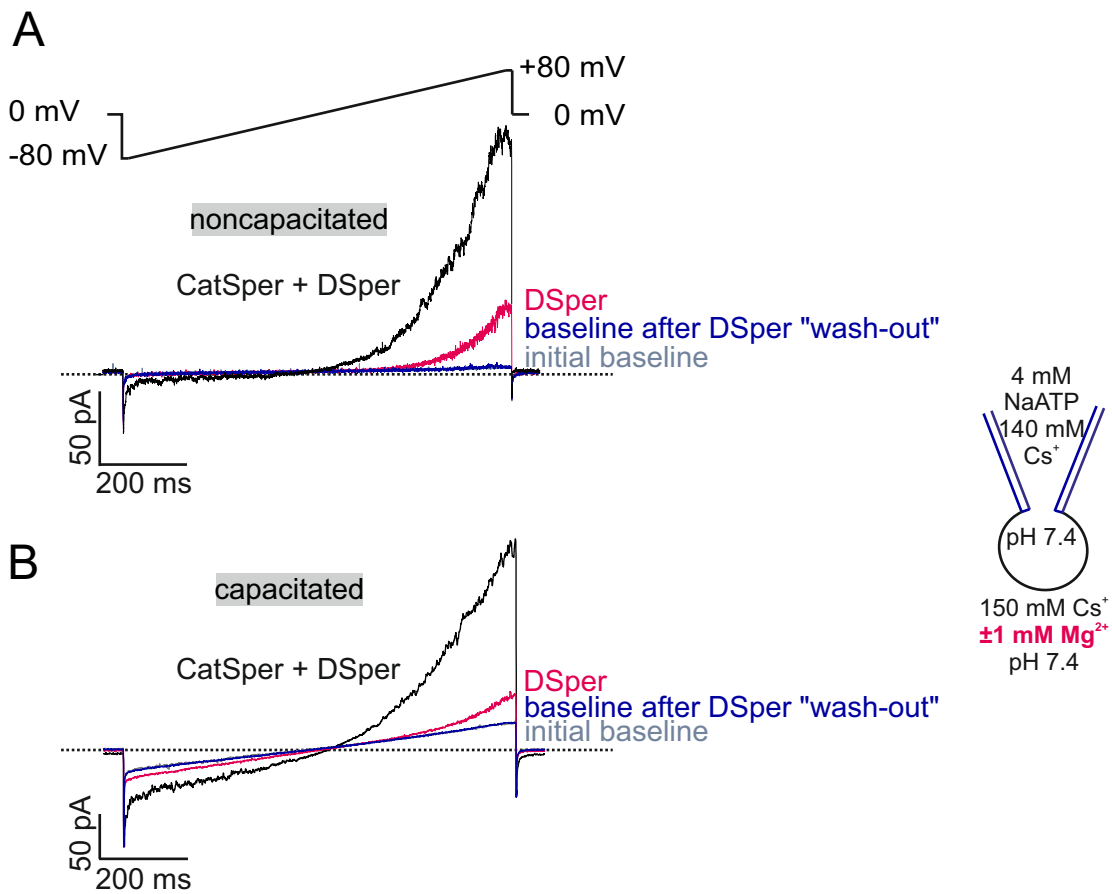

Fig. 1 - Supplementary Fig. 2: DSper currents are recorded under stable conditions.

Supplement: supp [file elife-35853-supp-v1.zip › elife_poa_e35853_Figure_1_figure_supplement_2.pdf]

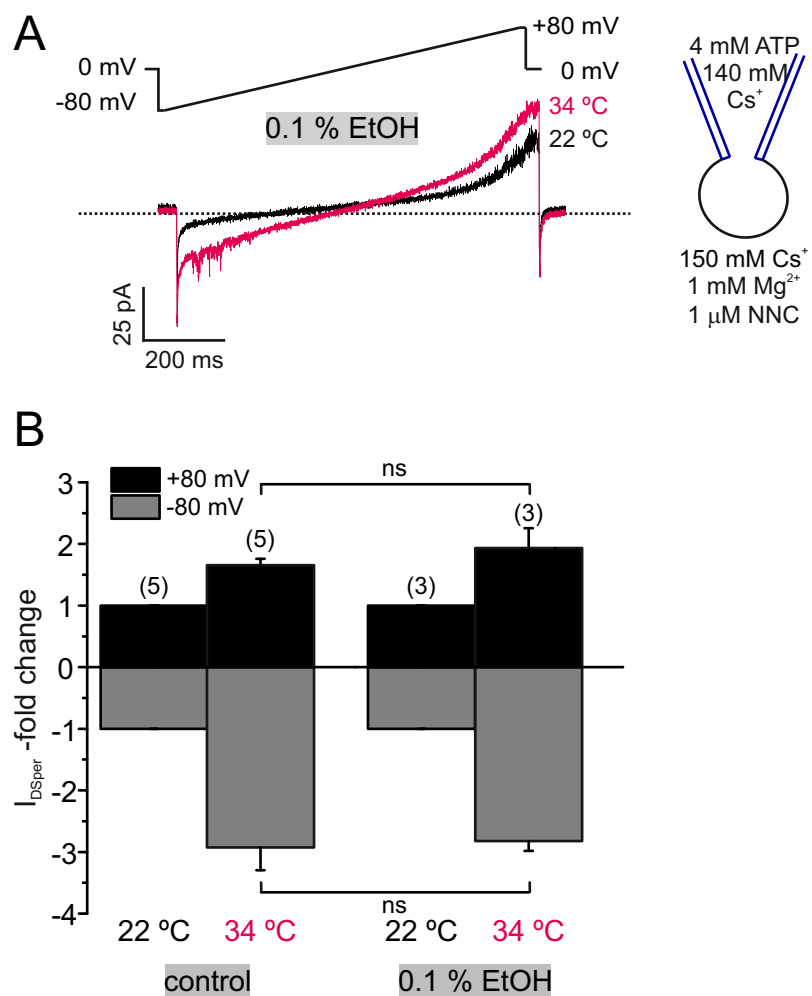

Fig. 5 - Supplementary Fig. 1: EtOH vehicle control

Supplement: supp [file elife-35853-supp-v1.zip › elife_poa_e35853_Figure_5_figure_supplement_1.pdf]

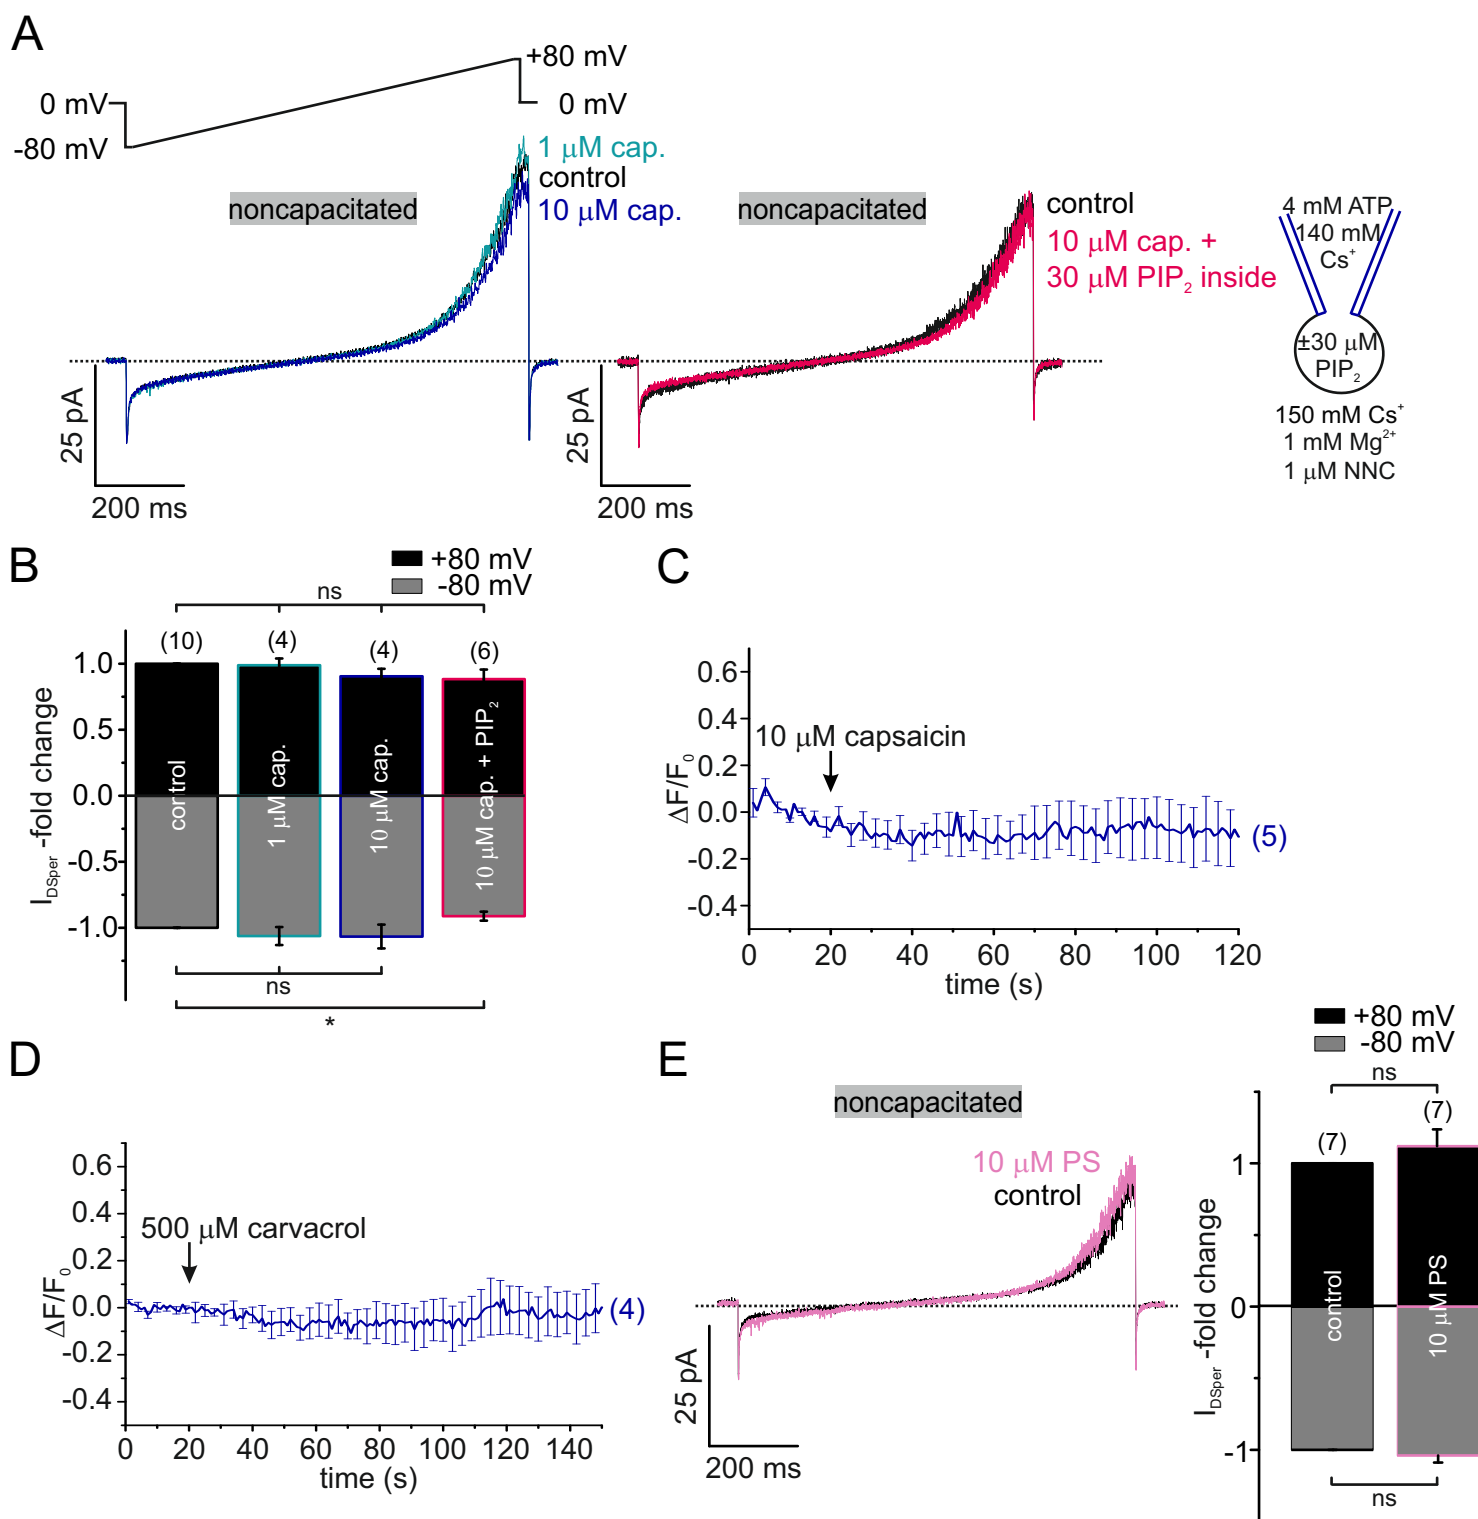

Fig. 4 - Supplementary Fig. 1:  
TRPV1, TRPV3 and TRPM3 are not functionally expressed in human spermatozoa

Supplement: supp [file elife-35853-supp-v1.zip › elife_poa_e35853_Figure_4_figure_supplement_1.pdf]
